# Supplementary material for: Effects of Hydroxytyrosol against Lipopolysaccharide-Induced Inflammation and Oxidative Stress in Bovine Mammary Epithelial Cells: A Natural Therapeutic Tool for Bovine Mastitis
Source: PubMed Central journal article supplement (PMC7464001; doi:10.3390/antiox9080693), 2020-08-03
Supplement: antioxidants-09-00693-s001.pdf [file antioxidants-09-00693-s001.pdf]

**Table 1.** Effects of HT on cell viability MTT assay.

|                | LPS - / HT - | LPS +/HT -      | LPS +/ HT 10 $\mu$ M | LPS +/ HT 25 $\mu$ M |
|----------------|--------------|-----------------|----------------------|----------------------|
| Cell viability | 100 $\pm$ 0  | 99.2 $\pm$ 0.37 | 99 $\pm$ 0.44        | 96.8 $\pm$ 1.77      |

**Table 2.** Effects of HT on inflammation and oxidative stress in MAC-T cells stimulated with LPS for 1 hour

|               | LPS - / HT -    | LPS +/HT -       | LPS +/ HT 10 $\mu$ M | LPS +/ HT 25 $\mu$ M |
|---------------|-----------------|------------------|----------------------|----------------------|
| ROS           | 100 $\pm$ 0     | 282 $\pm$ 8.60   | 227.4 $\pm$ 19.02    | 211.4 $\pm$ 8.87     |
| GSH           | 0.95 $\pm$ 0.02 | 0.5 $\pm$ 0.05   | 0.7 $\pm$ 0.04       | 0.78 $\pm$ 0.05      |
| HO-1          | 1 $\pm$ 0       | 0.82 $\pm$ 0.05  | 1.18 $\pm$ 0.08      | 1.22 $\pm$ 0.07      |
| NQO-1         | 1 $\pm$ 0       | 0.78 $\pm$ 0.06  | 1.17 $\pm$ 0.07      | 1.38 $\pm$ 0.13      |
| Txnrd1        | 1 $\pm$ 0       | 0.61 $\pm$ 0.04  | 0.99 $\pm$ 0.09      | 1.06 $\pm$ 0.14      |
| NOX-1         | 1 $\pm$ 0       | 2.76 $\pm$ 0.11  | 2.28 $\pm$ 0.08      | 1.98 $\pm$ 0.12      |
| TNF- $\alpha$ | 450 $\pm$ 97.47 | 3060 $\pm$ 163.1 | 2160 $\pm$ 271.3     | 1880 $\pm$ 276.4     |
| IL1- $\beta$  | 118 $\pm$ 34.26 | 2214 $\pm$ 154.9 | 1650 $\pm$ 120.4     | 1400 $\pm$ 138.7     |
| IL-6          | 170 $\pm$ 30    | 3840 $\pm$ 120.8 | 2760 $\pm$ 317.2     | 2720 $\pm$ 171.5     |

ROS, reactive oxygen species; GSH, glutathione peroxidase; HO-1, heme oxygenase-1; NQO-1, NAD(P)H quinone oxidoreductase-1; NOX-1, NADPH oxidase 1; Txnrd1, thioredoxin reductase 1; TNF- $\alpha$ , tumor necrosis factor  $\alpha$ ; IL1- $\beta$ , interleukin 1- $\beta$ ; IL-6, interleukin 6.

**Table 3.** Effects of HT on inflammation and oxidative stress in MAC-T cells stimulated with LPS for 6 hours.

|               | LPS - / HT -    | LPS +/HT -       | LPS +/ HT 10 $\mu$ M | LPS +/ HT 25 $\mu$ M |
|---------------|-----------------|------------------|----------------------|----------------------|
| ROS           | 100 $\pm$ 0     | 321 $\pm$ 14.18  | 245 $\pm$ 14.49      | 200.2 $\pm$ 6        |
| GSH           | 0.96 $\pm$ 0.02 | 0.4 $\pm$ 0.05   | 0.74 $\pm$ 0.06      | 0.84 $\pm$ 0.06      |
| HO-1          | 1 $\pm$ 0       | 0.7 $\pm$ 0.08   | 1.2 $\pm$ 0.04       | 1.56 $\pm$ 0.07      |
| NQO-1         | 1 $\pm$ 0       | 0.59 $\pm$ 0.08  | 1.19 $\pm$ 0.13      | 1.48 $\pm$ 0.08      |
| Txnrd1        | 1 $\pm$ 0       | 0.53 $\pm$ 0.06  | 1.09 $\pm$ 0.09      | 1.2 $\pm$ 0.13       |
| NOX-1         | 1 $\pm$ 0       | 2.74 $\pm$ 0.10  | 2.18 $\pm$ 0.08      | 1.78 $\pm$ 0.10      |
| TNF- $\alpha$ | 270 $\pm$ 86.02 | 3876 $\pm$ 85.88 | 2092 $\pm$ 92.27     | 1608 $\pm$ 174.3     |
| IL1- $\beta$  | 118 $\pm$ 34.26 | 2988 $\pm$ 63.98 | 1842 $\pm$ 105.4     | 1288 $\pm$ 151       |
| IL-6          | 170 $\pm$ 30    | 3074 $\pm$ 119.6 | 2179 $\pm$ 104.9     | 1572 $\pm$ 192.8     |

ROS, reactive oxygen species; GSH, glutathione peroxidase; HO-1, heme oxygenase 1; NQO-1, NAD(P)H quinone oxidoreductase-1; NOX-1, NADPH oxidase 1; Txnrd1, thioredoxin reductase 1; TNF- $\alpha$ , tumor necrosis factor  $\alpha$ ; IL1- $\beta$ , interleukin 1- $\beta$ ; IL-6, interleukin 6.

**Table 4.** Effects of HT on casein isoforms in differentiated MAC-T cells

|                    | No differentiation | Differentiation LPS - / HT- | Differentiation LPS + / HT - | Differentiation LPS + / HT 10 $\mu$ M | Differentiation LPS + / HT 25 $\mu$ M |
|--------------------|--------------------|-----------------------------|------------------------------|---------------------------------------|---------------------------------------|
| $\alpha$ casein S1 | 0.26 $\pm$ 0.05    | 1 $\pm$ 0                   | 0.37 $\pm$ 0.07              | 0.75 $\pm$ 0.08                       | 1.01 $\pm$ 0.06                       |
| $\alpha$ casein S2 | 0.26 $\pm$ 0.05    | 1 $\pm$ 0                   | 0.34 $\pm$ 0.06              | 0.71 $\pm$ 0.12                       | 1.07 $\pm$ 0.08                       |
| $\beta$ casein     | 0.39 $\pm$ 0.05    | 1 $\pm$ 0                   | 0.40 $\pm$ 0.08              | 0.90 $\pm$ 0.09                       | 1.18 $\pm$ 0.09                       |
